# Supplementary material for: Sustainable Valorization of Brewer’s Spent Grain via Submerged Fermentation Using Talaromyces stollii for Laccase and Phenolic Compounds Production
Source: MDPI journal article supplement (doi:10.3390/recycling10040166), 2025-08-21
Supplement: s1 [file recycling-3815302-supplementary.pdf › recycling-3815302-supplementary.pdf]

## Article

# Sustainable Valorization of Brewer's Spent Grain via Submerged Fermentation Using *Talaromyces stollii* for Laccase and Phenolic Compound Production

Eric Coelho S. Lima <sup>1</sup>, Ana Caroline B. do Nascimento <sup>1</sup>, Rodrigo P. do Nascimento <sup>1</sup>, and Ivaldo Itabaiana Jr.<sup>1\*</sup>

<sup>1</sup> Federal University of Rio de Janeiro, Department of Biochemical Engineering, School of Chemistry, RJ, 21941-909, Brazil; ericcs14@gmail.com; rodrigo@eq.ufrj.br; ivaldo@eq.ufrj.br

\* Correspondence: ivaldo@eq.ufrj.br; Tel.: +5521 39387580

## Supplementary Material

**Table S.1:** Heating ramp program for the crude protein quantification digestion block

| Steps | Temperature (°C) | Time (min) |
|-------|------------------|------------|
| 1     | 125              | 30         |
| 2     | 200              | 15         |
| 3     | 250              | 15         |
| 4     | 300              | 15         |
| 5     | 400              | 80         |

Figure S.1: Chromatograms of the monomeric sugar fractions (glucose, xylose, and arabinose) derived from the biomass.

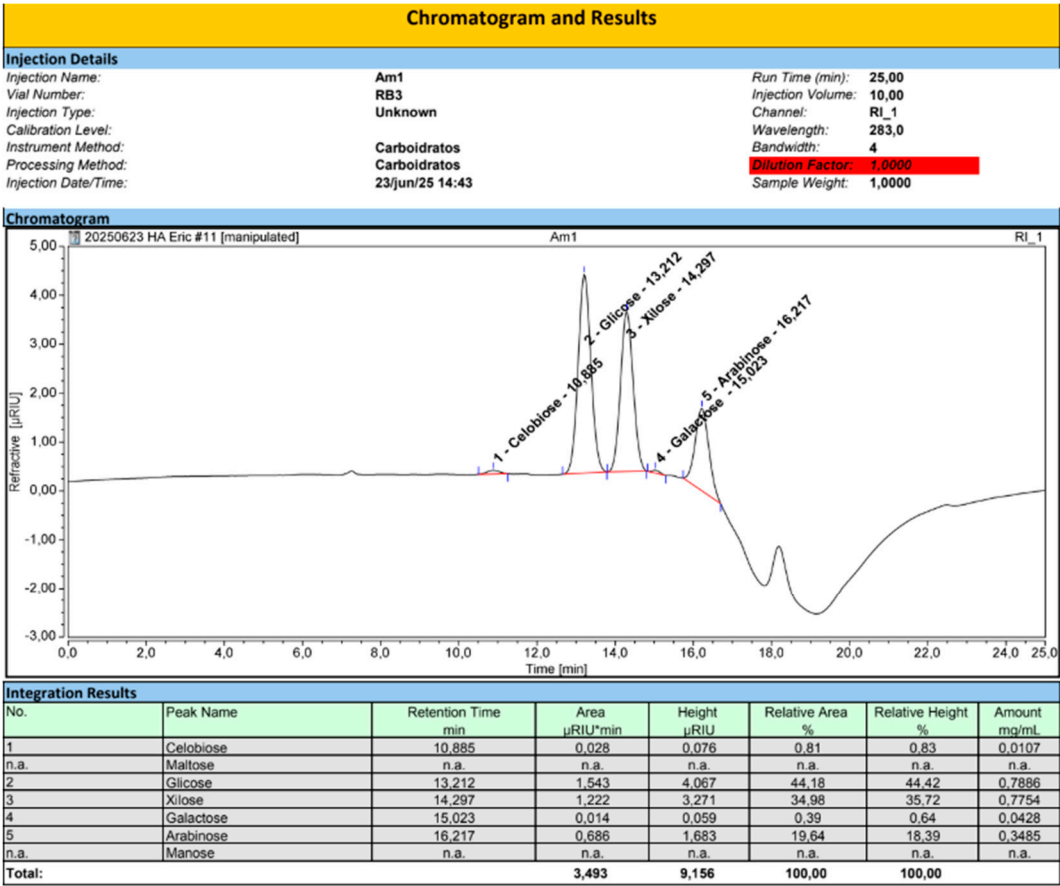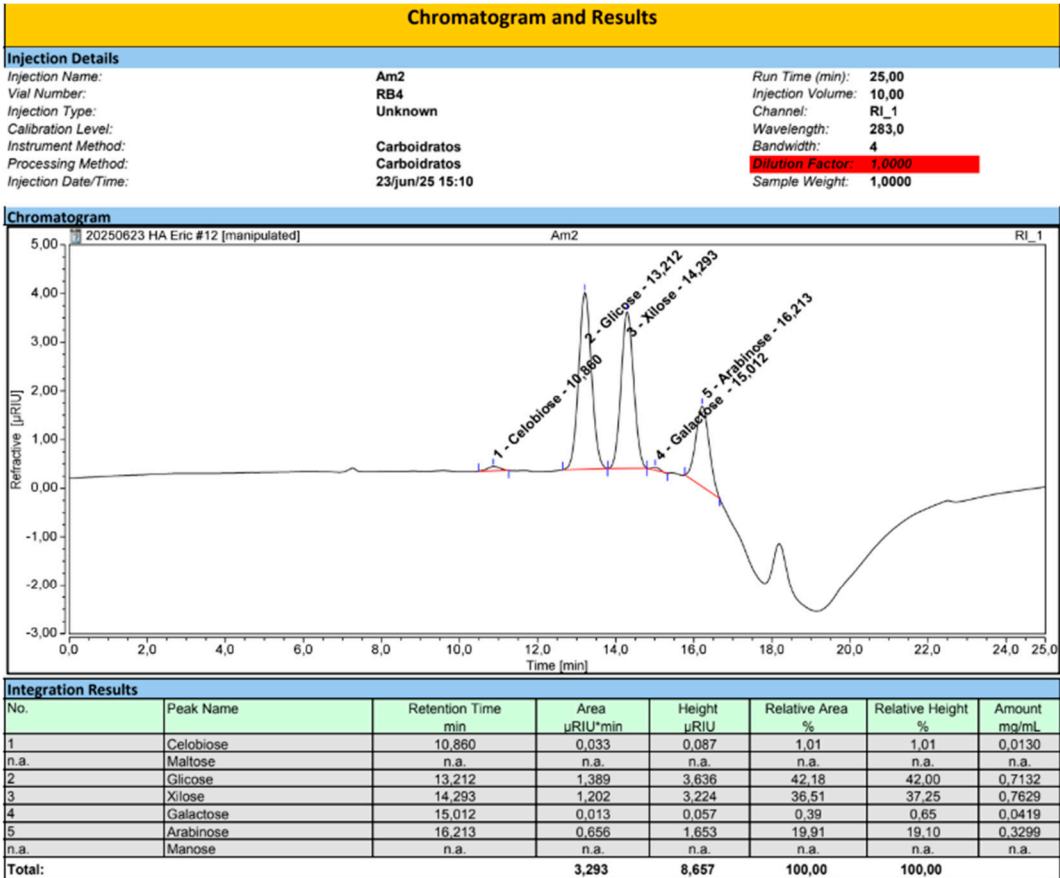

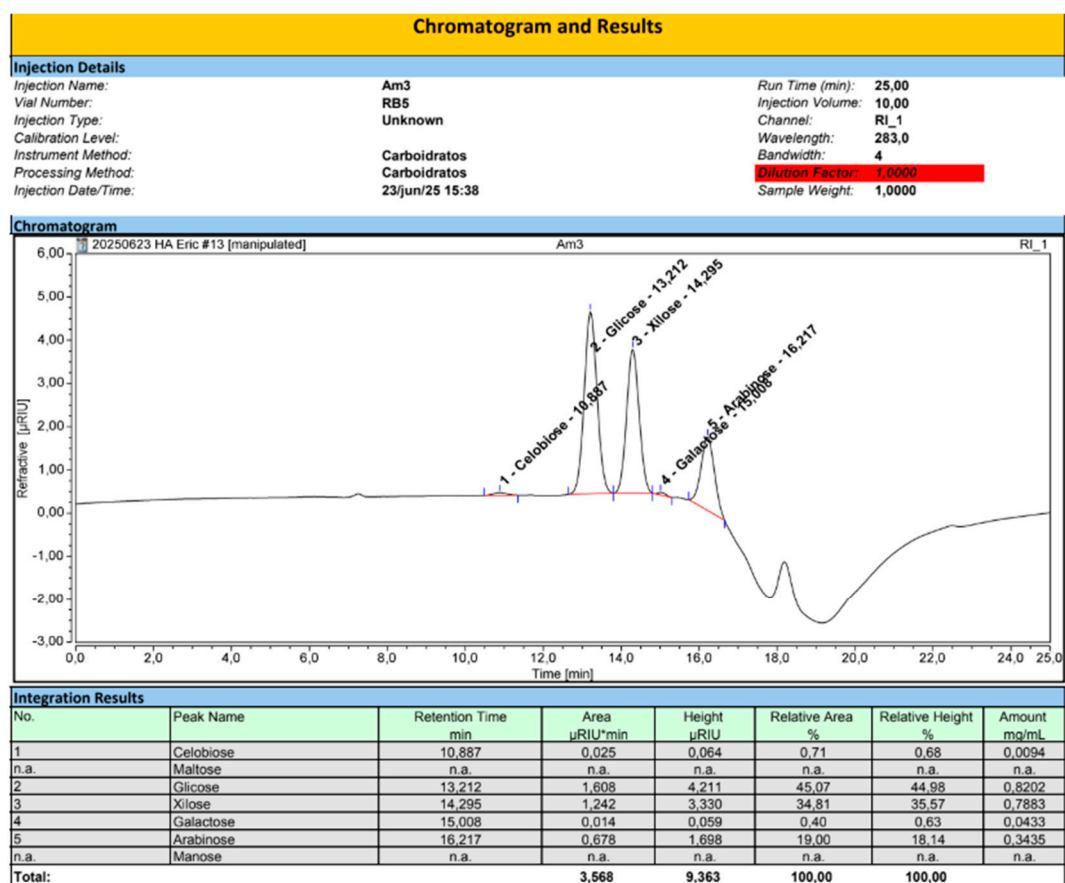

**Table S.2:** Concentration distribution for each point in the gallic acid standard curve

| Point | Distilled water (μL) | Gallic Acid (μL) | Gallic Acid (μg/mL) |
|-------|----------------------|------------------|---------------------|
| 1     | 79                   | 10               | 12,5                |
| 2     | 750                  | 50               | 62,5                |
| 3     | 700                  | 100              | 125                 |
| 4     | 600                  | 200              | 250                 |
| 5     | 500                  | 300              | 375                 |
| 6     | 400                  | 400              | 500                 |
| 7     | 300                  | 500              | 625                 |
| 8     | 200                  | 600              | 750                 |
| 9     | 100                  | 700              | 875                 |
| 10    | 0                    | 800              | 1000                |

**Figure S.2:** Standard curve of gallic acid

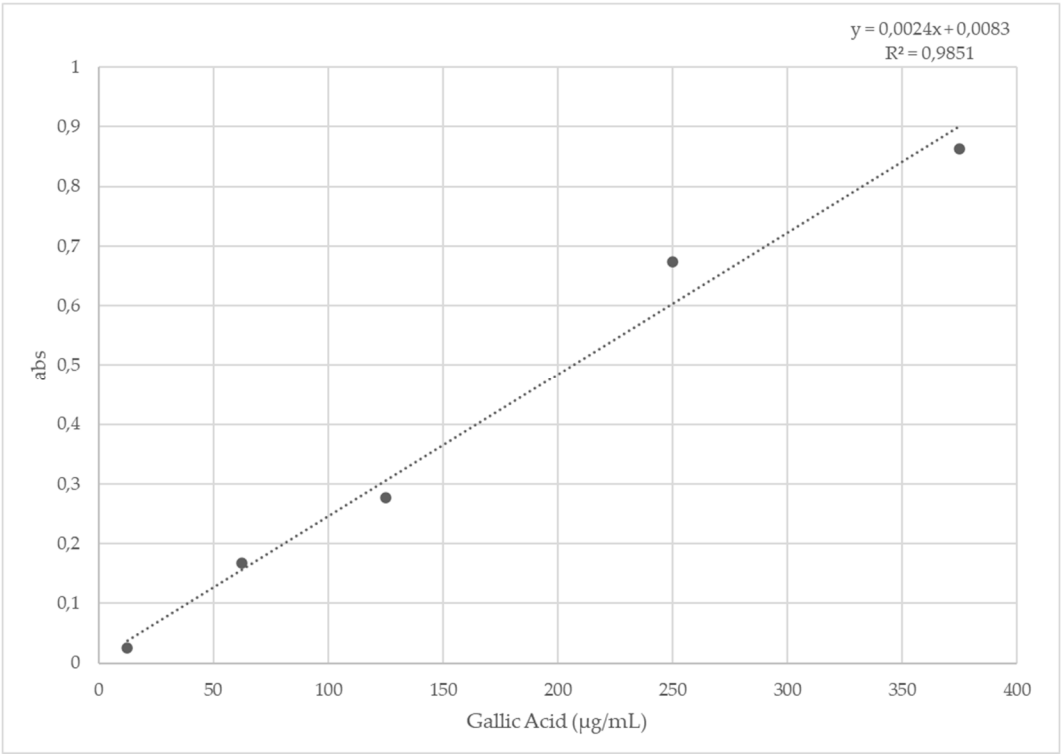

24  
25  
26  
27  
28  
29
